# Supplementary material for: Bioinks Enriched with ECM Components Obtained by Supercritical Extraction
Source: MDPI journal article supplement (doi:10.3390/biom12030394), 2022-03-02
Supplement: s1 [file s1]

Supplementary Figures:

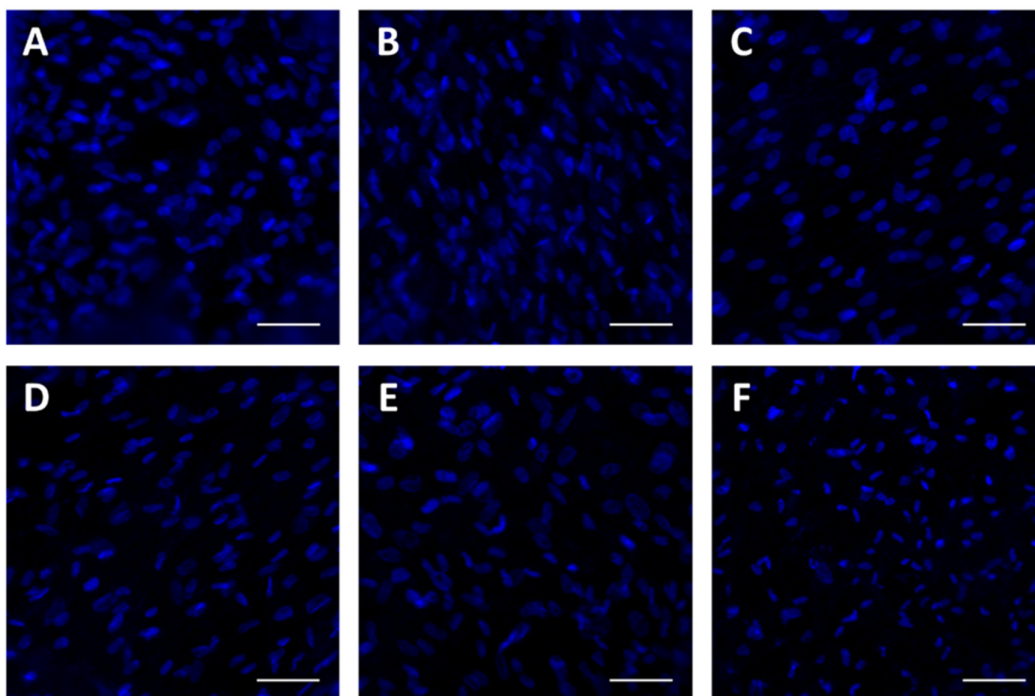

**Supplementary Figure S1:** DAPI staining of cell sheets subjected to different treatments. scCO<sub>2</sub> exposure at A) 20 MPa for 1h and B) 25 MPa for 2h; C) scCO<sub>2</sub>/ethanol exposure at 25 MPa for 2h; scCO<sub>2</sub>/Dehypon® exposure at D) 25 MPa and E) 30 MPa for 1h30m and F) 3h30m. Scale bar is of 100  $\mu$ m.

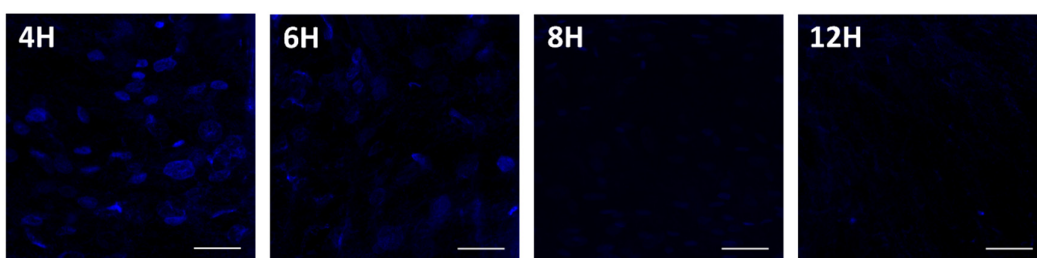

**Supplementary Figure S2:** DAPI staining of cell sheets immersed in 2% (v/v) Dehypon solutions for different incubation times. Scale bar is of 100  $\mu$ m.

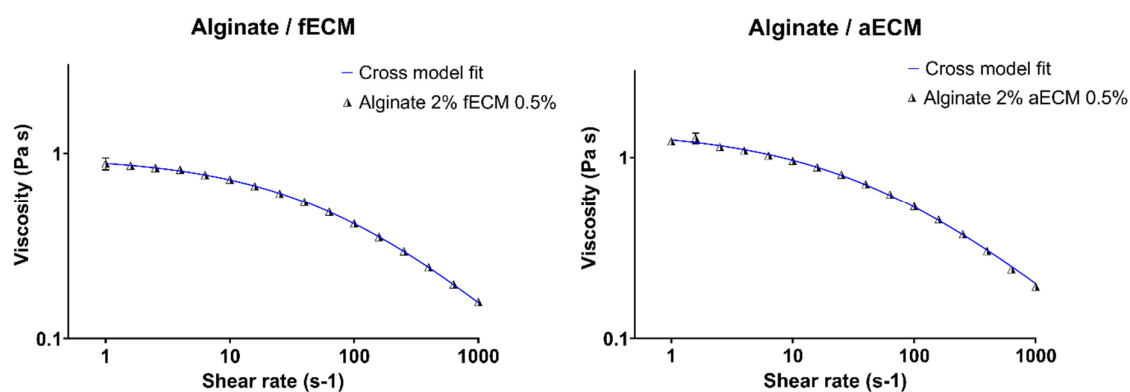

**Supplementary Figure S3:** Cross model-fitting of viscosity profiles for Alg/ECM blends

**Supplementary Table S1.** Values of zero-shear viscosity ( $\eta_0$ ),  $\alpha_c$ ,  $m$  and  $R^2$  after cross model-fitting of Alg/ECM blends viscosity profiles.

|                            | $\eta_0$ | $\alpha_c$ | $m$    | $R^2$  |
|----------------------------|----------|------------|--------|--------|
| <b>Alg 2 % / 0.5% fECM</b> | 0.9574   | 0.01583    | 0.5934 | 0.9807 |
| <b>Alg 2% - 0.5% aECM</b>  | 1.410    | 0.02522    | 0.5577 | 0.9865 |
